# Supplementary material for: Body Surface Area, Creatinine Excretion Rate, and Total Body Water: Reference Data for Adults in the United States
Source: PubMed Central journal article supplement — Kidney Med. 2021 Jan 12;3(2):312–3. doi: 10.1016/j.xkme.2020.10.009 (PMC8039403; doi:10.1016/j.xkme.2020.10.009), 2021-01-12
Supplement: mmc1.pdf [file mmc1.pdf]

## Item S1

Mathematica (12.0.0.0) code for calculation of body surface area, creatinine excretion rate and total body water:

```
fbsa[weight_, height_] := 0.007184 x height0.725 x weight0.425
fbmi[weight_, height_] := weight / (0.01 x height) ^ 2
fixfwer[age_, weight_] := 0.00884 (500.47 - 6.19 age + 12.51 weight)
fixmwer[age_, weight_] := 0.00884 (879.89 - 6.19 age + 12.51 weight)
fixfber[age_, weight_] := 0.00884 (534.98 - 6.19 age + 12.51 weight)
fixmber[age_, weight_] := 0.00884 (914.4 - 6.19 age + 12.51 weight)
fIxWeb[sex_, race_, age_, weight_] :=
  If[sex == 2, If[race == 4, fixfber[age, weight], fixfwer[age, weight]],
    If[race == 4, fixmber[age, weight], fixmwer[age, weight]]]
ftbwchfw[age_, weight_, height_] := -10.5 - 0.01 age + 0.18 height + 0.2 weight
ftbwchmw[age_, weight_, height_] := 23.04 - 0.03 age + 0.5 weight -  $\frac{6200 \cdot \text{weight}}{\text{height}^2}$ 
ftbwchfb[age_, weight_, height_] := -16.71 - 0.05 age + 0.24 height + 0.22 weight
ftbwchmb[age_, weight_, height_] := -18.37 - 0.09 age + 0.25 height + 0.34 weight
fChunleaWeb[sex_, race_, age_, weight_, height_] :=
  If[sex == 2, If[race == 4, ftbwchfb[age, weight, height], ftbwchfw[age, weight, height]],
    If[race == 4, ftbwchmb[age, weight, height], ftbwchmw[age, weight, height]]]
inpath = "NHANES-File.csv";
nhanestaskimp = Dataset[Import[inpath, "Dataset", "HeaderLines" -> 1]];
%[All, Append[#, "hsa" -> If[!mbxwt > 0 && !mbxht > 0, NumberForm[fbsa[mbxwt, mbxht], 3], "na", "na"]] &];
%[All,
  Append[#,
    "cerix" -> If[!mbxwt > 0 && !ridageyr > 19, NumberForm[fIxWeb[riagendr, ridreth3, ridageyr, mbxwt] / 0.00884, {5, 0}],
    "na", "na"]] &];
%[All,
  Append[#, "tbwch" -> If[!mbxwt > 0 && !mbxht > 0 && !ridageyr > 19,
    NumberForm[fChunleaWeb[riagendr, ridreth3, ridageyr, mbxwt, mbxht], {4, 1}], "na", "na"]] &];
%[All,
  Append[#, "cerixsi" -> If[!mbxwt > 0 && !ridageyr > 19, NumberForm[fIxWeb[riagendr, ridreth3, ridageyr, mbxwt], {5, 3}],
    "na", "na"]] &];
```

## Item S2

Example R code for calculating means, standard errors and quantiles (Table S3):

```
# INSTALL AND LOAD PACKAGES #
#+ message = FALSE, warning=FALSE
library(survey)
library(plyr)
library(dplyr)
library(data.table)
library(gt)
# READ.CSV FOR CSV FILES #
nhanesimp.csv <- read.csv("NHANESfile.csv", header = TRUE)
# Missing to 0 #
nhanesAnalysis <- nhanesimp.csv
nhanesAnalysis[is.na(nhanesAnalysis)] <- 0
# Survey Weights #
nhanesDesign <- svydesign(id = ~sdmvpvsu,
  strata = ~sdmvstra,
  weights = ~wtmec4yr,
  nest = TRUE,
  data = nhanesAnalysis)
#####
# female, bsa #####
testDesign1 <- subset(nhanesDesign, ridageyr>19 & riagendr==2 & ridexprg!=1 & bsa>0)
testDesign2 <- subset(nhanesDesign, ridageyr>19 & ridageyr<30 & riagendr==2 & ridexprg!=1 & bsa>0)
testDesign3 <- subset(nhanesDesign, ridageyr>29 & ridageyr<40 & riagendr==2 & ridexprg!=1 & bsa>0)
testDesign4 <- subset(nhanesDesign, ridageyr>39 & ridageyr<50 & riagendr==2 & ridexprg!=1 & bsa>0)
testDesign5 <- subset(nhanesDesign, ridageyr>49 & ridageyr<60 & riagendr==2 & ridexprg!=1 & bsa>0)
testDesign6 <- subset(nhanesDesign, ridageyr>59 & ridageyr<70 & riagendr==2 & ridexprg!=1 & bsa>0)
testDesign7 <- subset(nhanesDesign, ridageyr>69 & ridageyr<80 & riagendr==2 & ridexprg!=1 & bsa>0)
testDesign8 <- subset(nhanesDesign, ridageyr>79 & riagendr==2 & ridexprg!=1 & bsa>0)
# step 1 ###
dim <- dim(testDesign1)
mean <- svymean(~bsa, testDesign1, na.rm=T)
quant <- svyquantile(~bsa, testDesign1, quantile=c(0.05,0.1,0.15,0.25,0.5,0.75,0.85,0.9,0.95),ci=TRUE)
dat1 <- as.data.frame(dim[1])
names(dat1) <- c("Number of examined persons")
dat2 <- as.data.frame(mean)
names(dat2) <- c("Mean", "Standard error of the mean")
dat3 <- as.data.frame(quant[1])
names(dat3) <- c("5th", "10th", "15th", "25th", "50th", "75th", "85th", "90th", "95th")
dat4 <- merge(dat1, dat2)
dat5 <- merge(dat4, dat3)
temp1 <- dat5
# step 2 ###
dim <- dim(testDesign2)
mean <- svymean(~bsa, testDesign2, na.rm=T)
quant <- svyquantile(~bsa, testDesign2, quantile=c(0.05,0.1,0.15,0.25,0.5,0.75,0.85,0.9,0.95),ci=TRUE)
dat1 <- as.data.frame(dim[1])
names(dat1) <- c("Number of examined persons")
dat2 <- as.data.frame(mean)
names(dat2) <- c("Mean", "Standard error of the mean")
dat3 <- as.data.frame(quant[1])
names(dat3) <- c("5th", "10th", "15th", "25th", "50th", "75th", "85th", "90th", "95th")
dat4 <- merge(dat1, dat2)
dat5 <- merge(dat4, dat3)
temp2 <- rbind(temp1, dat5)
# step 3 ###
dim <- dim(testDesign3)
mean <- svymean(~bsa, testDesign3, na.rm=T)
quant <- svyquantile(~bsa, testDesign3, quantile=c(0.05,0.1,0.15,0.25,0.5,0.75,0.85,0.9,0.95),ci=TRUE)
dat1 <- as.data.frame(dim[1])
names(dat1) <- c("Number of examined persons")
dat2 <- as.data.frame(mean)
names(dat2) <- c("Mean", "Standard error of the mean")
dat3 <- as.data.frame(quant[1])
names(dat3) <- c("5th", "10th", "15th", "25th", "50th", "75th", "85th", "90th", "95th")
dat4 <- merge(dat1, dat2)
dat5 <- merge(dat4, dat3)
temp3 <- rbind(temp2, dat5)
# step 4 ###
dim <- dim(testDesign4)
mean <- svymean(~bsa, testDesign4, na.rm=T)
```

```
quant <- svyquantile(~bsa, testDesign4, quantile=c(0.05,0.1,0.15,0.25,0.5,0.75,0.85,0.9,0.95),ci=TRUE)
dat1 <- as.data.frame(dim[1])
names(dat1) <- c("Number of examined persons")
dat2 <- as.data.frame(mean)
names(dat2) <- c("Mean", "Standard error of the mean")
dat3 <- as.data.frame(quant[1])
names(dat3) <- c("5th", "10th", "15th", "25th", "50th", "75th", "85th", "90th", "95th")
dat4 <- merge(dat1, dat2)
dat5 <- merge(dat4, dat3)
temp4 <- rbind(temp3, dat5)
# step 5 ###
dim <- dim(testDesign5)
mean <- svymean(~bsa, testDesign5, na.rm=T)
quant <- svyquantile(~bsa, testDesign5, quantile=c(0.05,0.1,0.15,0.25,0.5,0.75,0.85,0.9,0.95),ci=TRUE)
dat1 <- as.data.frame(dim[1])
names(dat1) <- c("Number of examined persons")
dat2 <- as.data.frame(mean)
names(dat2) <- c("Mean", "Standard error of the mean")
dat3 <- as.data.frame(quant[1])
names(dat3) <- c("5th", "10th", "15th", "25th", "50th", "75th", "85th", "90th", "95th")
dat4 <- merge(dat1, dat2)
dat5 <- merge(dat4, dat3)
temp5 <- rbind(temp4, dat5)
# step 6 ###
dim <- dim(testDesign6)
mean <- svymean(~bsa, testDesign6, na.rm=T)
quant <- svyquantile(~bsa, testDesign6, quantile=c(0.05,0.1,0.15,0.25,0.5,0.75,0.85,0.9,0.95),ci=TRUE)
dat1 <- as.data.frame(dim[1])
names(dat1) <- c("Number of examined persons")
dat2 <- as.data.frame(mean)
names(dat2) <- c("Mean", "Standard error of the mean")
dat3 <- as.data.frame(quant[1])
names(dat3) <- c("5th", "10th", "15th", "25th", "50th", "75th", "85th", "90th", "95th")
dat4 <- merge(dat1, dat2)
dat5 <- merge(dat4, dat3)
temp6 <- rbind(temp5, dat5)
# step 7 ###
dim <- dim(testDesign7)
mean <- svymean(~bsa, testDesign7, na.rm=T)
quant <- svyquantile(~bsa, testDesign7, quantile=c(0.05,0.1,0.15,0.25,0.5,0.75,0.85,0.9,0.95),ci=TRUE)
dat1 <- as.data.frame(dim[1])
names(dat1) <- c("Number of examined persons")
dat2 <- as.data.frame(mean)
names(dat2) <- c("Mean", "Standard error of the mean")
dat3 <- as.data.frame(quant[1])
names(dat3) <- c("5th", "10th", "15th", "25th", "50th", "75th", "85th", "90th", "95th")
dat4 <- merge(dat1, dat2)
dat5 <- merge(dat4, dat3)
temp7 <- rbind(temp6, dat5)
# step 8 ###
dim <- dim(testDesign8)
mean <- svymean(~bsa, testDesign8, na.rm=T)
quant <- svyquantile(~bsa, testDesign8, quantile=c(0.05,0.1,0.15,0.25,0.5,0.75,0.85,0.9,0.95),ci=TRUE)
dat1 <- as.data.frame(dim[1])
names(dat1) <- c("Number of examined persons")
dat2 <- as.data.frame(mean)
names(dat2) <- c("Mean", "Standard error of the mean")
dat3 <- as.data.frame(quant[1])
names(dat3) <- c("5th", "10th", "15th", "25th", "50th", "75th", "85th", "90th", "95th")
dat4 <- merge(dat1, dat2)
dat5 <- merge(dat4, dat3)
temp8 <- rbind(temp7, dat5)
setattr(temp8, "row.names", c("20 -79 years", "20-29 years", "30-39 years", "40-49 years", "50-59 years", "60-69 years", "70-79
years", "80 years and over"))
bsafemale1518 <- temp8
```

**Table S1**

**Table S1: Body surface area for non-pregnant women, 20 years and over, United States, 2015-2018.**

|                         | Number of examined persons | Mean | Standard error of the mean | Percentile      |                  |                  |                  |                  |                  |                  |                  |                  |
|-------------------------|----------------------------|------|----------------------------|-----------------|------------------|------------------|------------------|------------------|------------------|------------------|------------------|------------------|
|                         |                            |      |                            | 5 <sup>th</sup> | 10 <sup>th</sup> | 15 <sup>th</sup> | 25 <sup>th</sup> | 50 <sup>th</sup> | 75 <sup>th</sup> | 85 <sup>th</sup> | 90 <sup>th</sup> | 95 <sup>th</sup> |
| <i>m</i> <sup>2</sup>   |                            |      |                            |                 |                  |                  |                  |                  |                  |                  |                  |                  |
| 20 years and over . . . | 5381                       | 1.80 | 0.007                      | 1.48            | 1.53             | 1.58             | 1.64             | 1.78             | 1.94             | 2.03             | 2.11             | 2.22             |
| 20-29 years . . . . .   | 827                        | 1.79 | 0.011                      | 1.46            | 1.51             | 1.55             | 1.61             | 1.75             | 1.92             | 2.03             | 2.13             | 2.22             |
| 30-39 years . . . . .   | 871                        | 1.83 | 0.011                      | 1.49            | 1.54             | 1.58             | 1.67             | 1.79             | 1.98             | 2.07             | 2.17             | 2.30             |
| 40-49 years . . . . .   | 899                        | 1.84 | 0.014                      | 1.52            | 1.57             | 1.61             | 1.68             | 1.82             | 1.99             | 2.09             | 2.14             | 2.26             |
| 50-59 years . . . . .   | 915                        | 1.82 | 0.010                      | 1.49            | 1.55             | 1.60             | 1.66             | 1.81             | 1.94             | 2.03             | 2.11             | 2.23             |
| 60-69 years . . . . .   | 979                        | 1.81 | 0.013                      | 1.49            | 1.56             | 1.60             | 1.67             | 1.80             | 1.94             | 2.04             | 2.10             | 2.17             |
| 70-79 years . . . . .   | 531                        | 1.76 | 0.011                      | 1.46            | 1.51             | 1.56             | 1.63             | 1.74             | 1.87             | 1.94             | 2.00             | 2.09             |
| 80 years and over       | 359                        | 1.67 | 0.012                      | 1.38            | 1.44             | 1.49             | 1.55             | 1.65             | 1.78             | 1.85             | 1.92             | 1.97             |

**Table S2**

**Table S2: Body surface area for men, 20 years and over, United States, 2015-2018.**

|                         | Number of examined persons | Mean | Standard error of the mean | Percentile      |                  |                  |                  |                  |                  |                  |                  |                  |
|-------------------------|----------------------------|------|----------------------------|-----------------|------------------|------------------|------------------|------------------|------------------|------------------|------------------|------------------|
|                         |                            |      |                            | 5 <sup>th</sup> | 10 <sup>th</sup> | 15 <sup>th</sup> | 25 <sup>th</sup> | 50 <sup>th</sup> | 75 <sup>th</sup> | 85 <sup>th</sup> | 90 <sup>th</sup> | 95 <sup>th</sup> |
| <i>m</i> <sup>2</sup>   |                            |      |                            |                 |                  |                  |                  |                  |                  |                  |                  |                  |
| 20 years and over . . . | 5076                       | 2.05 | 0.007                      | 1.71            | 1.76             | 1.81             | 1.88             | 2.03             | 2.20             | 2.29             | 2.36             | 2.46             |
| 20-29 years . . . . .   | 801                        | 2.00 | 0.015                      | 1.69            | 1.73             | 1.75             | 1.82             | 1.97             | 2.16             | 2.27             | 2.32             | 2.45             |
| 30-39 years . . . . .   | 804                        | 2.10 | 0.012                      | 1.75            | 1.81             | 1.87             | 1.93             | 2.06             | 2.24             | 2.35             | 2.42             | 2.56             |
| 40-49 years . . . . .   | 765                        | 2.09 | 0.011                      | 1.73            | 1.81             | 1.86             | 1.94             | 2.08             | 2.22             | 2.34             | 2.39             | 2.49             |
| 50-59 years . . . . .   | 840                        | 2.07 | 0.012                      | 1.71            | 1.78             | 1.83             | 1.90             | 2.05             | 2.21             | 2.33             | 2.40             | 2.46             |
| 60-69 years . . . . .   | 964                        | 2.05 | 0.010                      | 1.71            | 1.77             | 1.81             | 1.89             | 2.05             | 2.19             | 2.28             | 2.34             | 2.44             |
| 70-79 years . . . . .   | 571                        | 2.01 | 0.012                      | 1.68            | 1.74             | 1.79             | 1.86             | 2.01             | 2.16             | 2.21             | 2.25             | 2.37             |
| 80 years and over       | 331                        | 1.92 | 0.012                      | 1.60            | 1.66             | 1.70             | 1.79             | 1.93             | 2.05             | 2.13             | 2.16             | 2.23             |

**Table S3**

**Table S3: Creatinine excretion rate for non-pregnant women, 20 – 79 years, United States, 2015-2018.**

|                         | Number of examined persons | Mean | Standard error of the mean | Percentile      |                  |                  |                  |                  |                  |                  |                  |                  |
|-------------------------|----------------------------|------|----------------------------|-----------------|------------------|------------------|------------------|------------------|------------------|------------------|------------------|------------------|
|                         |                            |      |                            | 5 <sup>th</sup> | 10 <sup>th</sup> | 15 <sup>th</sup> | 25 <sup>th</sup> | 50 <sup>th</sup> | 75 <sup>th</sup> | 85 <sup>th</sup> | 90 <sup>th</sup> | 95 <sup>th</sup> |
| <i>mg/d</i>             |                            |      |                            |                 |                  |                  |                  |                  |                  |                  |                  |                  |
| 20 - 79 years . . . . . | 5027                       | 1187 | 9.1                        | 802             | 872              | 919              | 994              | 1136             | 1340             | 1460             | 1567             | 1740             |
| 20-29 years . . . . .   | 827                        | 1289 | 14.1                       | 960             | 996              | 1032             | 1077             | 1221             | 1440             | 1576             | 1699             | 1827             |
| 30-39 years . . . . .   | 872                        | 1283 | 12.5                       | 918             | 968              | 1008             | 1086             | 1211             | 1429             | 1564             | 1686             | 1878             |
| 40-49 years . . . . .   | 900                        | 1239 | 17.9                       | 883             | 945              | 977              | 1039             | 1174             | 1384             | 1518             | 1649             | 1794             |
| 50-59 years . . . . .   | 915                        | 1152 | 12.7                       | 786             | 853              | 901              | 965              | 1099             | 1286             | 1398             | 1465             | 1703             |
| 60-69 years . . . . .   | 981                        | 1085 | 15.1                       | 747             | 804              | 839              | 906              | 1040             | 1226             | 1343             | 1397             | 1529             |
| 70-79 years . . . . .   | 532                        | 980  | 11.9                       | 675             | 716              | 759              | 825              | 962              | 1091             | 1172             | 1247             | 1403             |

**Table S4**

**Table S4: Creatinine excretion rate for men, 20 – 79 years, United States, 2015-2018.**

|                         | Number of examined persons | Mean | Standard error of the mean | Percentile      |                  |                  |                  |                  |                  |                  |                  |                  |
|-------------------------|----------------------------|------|----------------------------|-----------------|------------------|------------------|------------------|------------------|------------------|------------------|------------------|------------------|
|                         |                            |      |                            | 5 <sup>th</sup> | 10 <sup>th</sup> | 15 <sup>th</sup> | 25 <sup>th</sup> | 50 <sup>th</sup> | 75 <sup>th</sup> | 85 <sup>th</sup> | 90 <sup>th</sup> | 95 <sup>th</sup> |
| <i>mg/d</i>             |                            |      |                            |                 |                  |                  |                  |                  |                  |                  |                  |                  |
| 20 - 79 years . . . . . | 4750                       | 1736 | 8.2                        | 1338            | 1418             | 1463             | 1540             | 1694             | 1887             | 2009             | 2122             | 2276             |
| 20-29 years . . . . .   | 802                        | 1802 | 17.9                       | 1441            | 1500             | 1536             | 1593             | 1755             | 1955             | 2082             | 2183             | 2344             |
| 30-39 years . . . . .   | 804                        | 1853 | 15.0                       | 1483            | 1553             | 1586             | 1651             | 1794             | 1989             | 2131             | 2226             | 2431             |
| 40-49 years . . . . .   | 766                        | 1783 | 13.2                       | 1437            | 1483             | 1536             | 1601             | 1747             | 1909             | 2035             | 2127             | 2261             |
| 50-59 years . . . . .   | 842                        | 1693 | 14.0                       | 1343            | 1404             | 1433             | 1504             | 1661             | 1827             | 1928             | 2096             | 2185             |
| 60-69 years . . . . .   | 965                        | 1627 | 10.4                       | 1280            | 1333             | 1364             | 1441             | 1604             | 1768             | 1861             | 1942             | 2087             |
| 70-79 years . . . . .   | 571                        | 1524 | 13.5                       | 1172            | 1249             | 1291             | 1366             | 1507             | 1656             | 1746             | 1788             | 1922             |

## Table S5

**Table S5: Total body water for non-pregnant women, 20 – 79 years, United States, 2015-2018.**

|                         | Number of examined persons | Mean | Standard error of the mean | Percentile      |                  |                  |                  |                  |                  |                  |                  |                  |
|-------------------------|----------------------------|------|----------------------------|-----------------|------------------|------------------|------------------|------------------|------------------|------------------|------------------|------------------|
|                         |                            |      |                            | 5 <sup>th</sup> | 10 <sup>th</sup> | 15 <sup>th</sup> | 25 <sup>th</sup> | 50 <sup>th</sup> | 75 <sup>th</sup> | 85 <sup>th</sup> | 90 <sup>th</sup> | 95 <sup>th</sup> |
| /                       |                            |      |                            |                 |                  |                  |                  |                  |                  |                  |                  |                  |
| 20 - 79 years . . . . . | 5022                       | 34.1 | 0.14                       | 27.3            | 28.4             | 29.2             | 30.6             | 33.3             | 36.8             | 39.2             | 40.9             | 44.0             |
| 20-29 years . . . . .   | 827                        | 34.1 | 0.23                       | 27.2            | 28.3             | 29.1             | 30.2             | 33.0             | 37.0             | 39.8             | 41.8             | 44.0             |
| 30-39 years . . . . .   | 871                        | 34.8 | 0.24                       | 27.5            | 28.4             | 29.3             | 30.9             | 33.6             | 37.6             | 40.1             | 42.8             | 45.9             |
| 40-49 years . . . . .   | 899                        | 34.9 | 0.34                       | 27.8            | 29.0             | 29.7             | 31.1             | 33.9             | 37.7             | 40.1             | 42.2             | 45.6             |
| 50-59 years . . . . .   | 915                        | 34.1 | 0.22                       | 27.4            | 28.5             | 29.4             | 30.6             | 33.4             | 36.4             | 39.0             | 40.3             | 43.4             |
| 60-69 years . . . . .   | 979                        | 33.7 | 0.26                       | 27.1            | 28.4             | 29.2             | 30.6             | 33.2             | 36.3             | 38.4             | 39.9             | 41.9             |
| 70-79 years . . . . .   | 531                        | 32.3 | 0.22                       | 26.4            | 27.1             | 28.3             | 29.5             | 31.9             | 34.7             | 36.0             | 37.6             | 39.8             |

## Table S6

**Table S6: Total body water for men, 20 – 79 years, United States, 2015-2018.**

|                         | Number of examined persons | Mean | Standard error of the mean | Percentile      |                  |                  |                  |                  |                  |                  |                  |                  |
|-------------------------|----------------------------|------|----------------------------|-----------------|------------------|------------------|------------------|------------------|------------------|------------------|------------------|------------------|
|                         |                            |      |                            | 5 <sup>th</sup> | 10 <sup>th</sup> | 15 <sup>th</sup> | 25 <sup>th</sup> | 50 <sup>th</sup> | 75 <sup>th</sup> | 85 <sup>th</sup> | 90 <sup>th</sup> | 95 <sup>th</sup> |
| /                       |                            |      |                            |                 |                  |                  |                  |                  |                  |                  |                  |                  |
| 20 - 79 years . . . . . | 4745                       | 49.3 | 0.20                       | 39.3            | 40.7             | 42.0             | 43.9             | 48.2             | 53.2             | 56.6             | 59.2             | 63.5             |
| 20-29 years . . . . .   | 801                        | 48.5 | 0.49                       | 39.6            | 40.3             | 41.1             | 43.1             | 47.0             | 52.7             | 56.2             | 58.6             | 64.4             |
| 30-39 years . . . . .   | 804                        | 50.9 | 0.38                       | 40.6            | 42.5             | 43.6             | 45.5             | 49.5             | 54.5             | 58.5             | 61.1             | 66.5             |
| 40-49 years . . . . .   | 765                        | 50.4 | 0.35                       | 39.8            | 41.7             | 43.0             | 45.4             | 49.2             | 54.3             | 57.2             | 60.3             | 65.2             |
| 50-59 years . . . . .   | 840                        | 49.2 | 0.36                       | 38.8            | 40.9             | 42.1             | 43.8             | 48.3             | 53.0             | 56.7             | 60.0             | 62.6             |
| 60-69 years . . . . .   | 964                        | 48.4 | 0.30                       | 38.7            | 39.9             | 41.2             | 43.3             | 47.6             | 52.1             | 54.8             | 58.0             | 61.0             |
| 70-79 years . . . . .   | 571                        | 46.7 | 0.37                       | 37.6            | 39.1             | 40.2             | 42.3             | 46.3             | 51.0             | 52.7             | 54.0             | 57.8             |

**Table S7**

**Table S7: Creatinine excretion rate for non-pregnant women, 20 – 79 years, United States, 2015-2018.**

|                   | Number of examined persons | Mean   | Standard error of the mean | Percentile      |                  |                  |                  |                  |                  |                  |                  |                  |
|-------------------|----------------------------|--------|----------------------------|-----------------|------------------|------------------|------------------|------------------|------------------|------------------|------------------|------------------|
|                   |                            |        |                            | 5 <sup>th</sup> | 10 <sup>th</sup> | 15 <sup>th</sup> | 25 <sup>th</sup> | 50 <sup>th</sup> | 75 <sup>th</sup> | 85 <sup>th</sup> | 90 <sup>th</sup> | 95 <sup>th</sup> |
| <i>mmol/d</i>     |                            |        |                            |                 |                  |                  |                  |                  |                  |                  |                  |                  |
| 20 - 79 years . . | 5027                       | 10.494 | 0.080                      | 7.085           | 7.711            | 8.127            | 8.789            | 10.046           | 11.845           | 12.909           | 13.855           | 15.382           |
| 20-29 years       | 827                        | 11.398 | 0.125                      | 8.485           | 8.806            | 9.126            | 9.517            | 10.798           | 12.741           | 13.928           | 15.027           | 16.151           |
| 30-39 years       | 872                        | 11.345 | 0.110                      | 8.110           | 8.554            | 8.919            | 9.597            | 10.705           | 12.629           | 13.822           | 14.909           | 16.604           |
| 40-49 years       | 900                        | 10.949 | 0.158                      | 7.824           | 8.352            | 8.639            | 9.193            | 10.377           | 12.234           | 13.421           | 14.571           | 15.858           |
| 50-59 years       | 915                        | 10.180 | 0.112                      | 6.946           | 7.536            | 7.963            | 8.534            | 9.713            | 11.368           | 12.359           | 12.946           | 15.048           |
| 60-69 years       | 981                        | 9.592  | 0.134                      | 6.607           | 7.106            | 7.419            | 8.013            | 9.191            | 10.843           | 11.869           | 12.346           | 13.496           |
| 70-79 years       | 532                        | 8.660  | 0.105                      | 5.967           | 6.325            | 6.712            | 7.288            | 8.499            | 9.643            | 10.364           | 11.022           | 12.400           |

**Table S8**

**Table S8: Creatinine excretion rate for men, 20 – 79 years, United States, 2015-2018.**

|                   | Number of examined persons | Mean   | Standard error of the mean | Percentile      |                  |                  |                  |                  |                  |                  |                  |                  |
|-------------------|----------------------------|--------|----------------------------|-----------------|------------------|------------------|------------------|------------------|------------------|------------------|------------------|------------------|
|                   |                            |        |                            | 5 <sup>th</sup> | 10 <sup>th</sup> | 15 <sup>th</sup> | 25 <sup>th</sup> | 50 <sup>th</sup> | 75 <sup>th</sup> | 85 <sup>th</sup> | 90 <sup>th</sup> | 95 <sup>th</sup> |
| <i>mmol/d</i>     |                            |        |                            |                 |                  |                  |                  |                  |                  |                  |                  |                  |
| 20 - 79 years . . | 4750                       | 15.350 | 0.073                      | 11.830          | 12.536           | 12.936           | 13.619           | 14.977           | 16.682           | 17.759           | 18.753           | 20.121           |
| 20-29 years       | 802                        | 15.931 | 0.158                      | 12.734          | 13.264           | 13.579           | 14.083           | 15.515           | 17.280           | 18.410           | 19.298           | 20.723           |
| 30-39 years       | 804                        | 16.377 | 0.133                      | 13.104          | 13.728           | 14.023           | 14.595           | 15.844           | 17.588           | 18.833           | 19.677           | 21.486           |
| 40-49 years       | 766                        | 15.760 | 0.117                      | 12.701          | 13.105           | 13.574           | 14.156           | 15.443           | 16.875           | 17.996           | 18.802           | 19.992           |
| 50-59 years       | 842                        | 14.970 | 0.124                      | 11.869          | 12.413           | 12.665           | 13.296           | 14.683           | 16.149           | 17.043           | 18.532           | 19.302           |
| 60-69 years       | 965                        | 14.384 | 0.092                      | 11.319          | 11.782           | 12.062           | 12.738           | 14.177           | 15.629           | 16.457           | 17.164           | 18.451           |
| 70-79 years       | 571                        | 13.470 | 0.119                      | 10.363          | 11.043           | 11.423           | 12.078           | 13.319           | 14.636           | 15.429           | 15.808           | 17.050           |
